# Supplementary material for: Genetic engineering and heterologous expression of the disorazol biosynthetic gene cluster via Red/ET recombineering
Source: PubMed Central journal article supplement (PMC4753468; doi:10.1038/srep21066), 2016-02-15
Supplement: srep21066-s1.pdf [file srep21066-s1.pdf]

## Supplemental Information

Genetic Engineering and Heterologous Expression of the Disorazol Biosynthetic Gene Cluster via Red/ET Recombineering

Qiang Tu, Jennifer Herrmann, Shengbiao Hu, Ritesh Raju, Xiaoying Bian, Youming Zhang and Rolf Müller

### Inventory of Supplemental Information

#### Supplemental data

**Figure S1.** Chemical structures of disorazols.

Structures of all disorazol derivatives mentioned in this paper. On Page 3.

**Figure S2.** related to Figure 2. Heterologous expression constructs of two type expression plasmids p15A-dis and p15A-dis-est. On Page 9.

**Figure S3.** related to Figure 3. HPLC-MS analysis of target screening of extracts from *M. xanthus*:: *p15A-dis*. On Page 10.

**Figure S4.** related to Figure 3. <sup>1</sup>H NMR spectrum data of disorazol A<sub>2</sub>. On Page 11.

**Figure S5.** related to Figure 5. Modify *disD* gene through Red/ET recombineering. On Page 13.

**Figure S6.** Construct of the recovered plasmid pTn-Rec\_IE2. On Page 7.

**Table S1** Oligonucleotides used in this study.

**Table S2** related to Figure 3. Target screening analysis data of extracts from *M. xanthus* ::*p15A-dis*. On Page 10.

**Table S3** related to Figure 3. NMR data for disA<sub>2</sub> comparison with the natural product. On Page 11.

**Table S4** Proteins encoded on the recovered plasmid pTn-Rec\_IE-2 and their putative function in disorazol biosynthesis. On Page 5.

#### Supplemental experimental procedures

#### Supplemental references

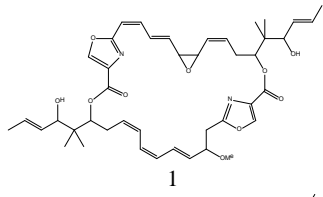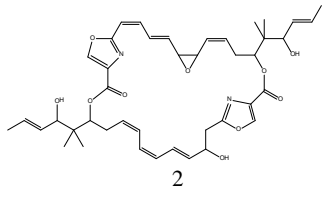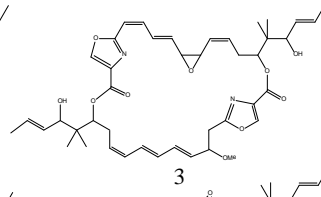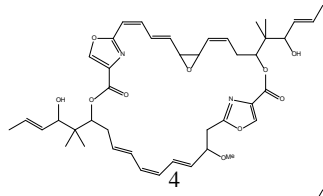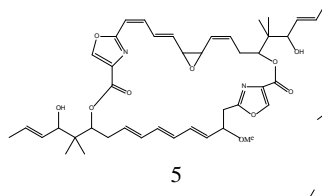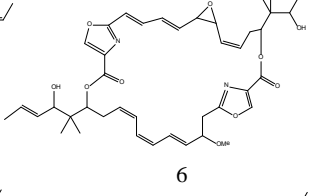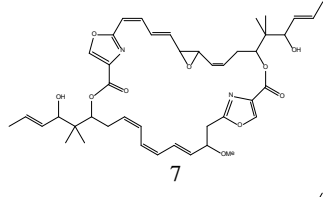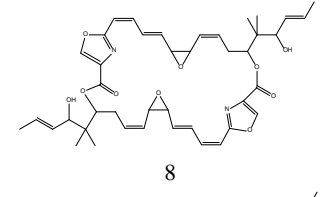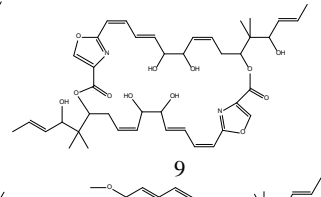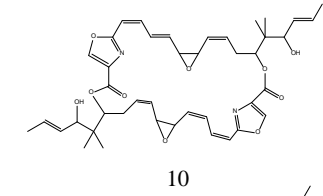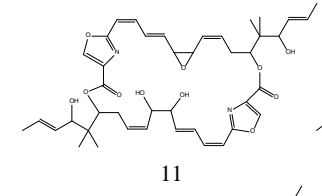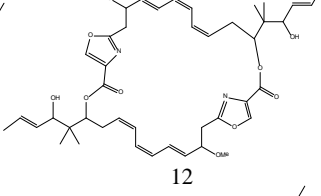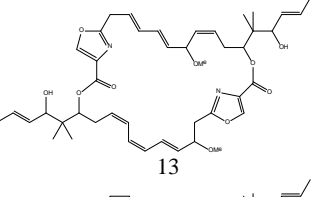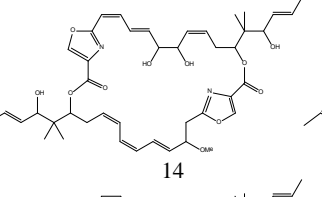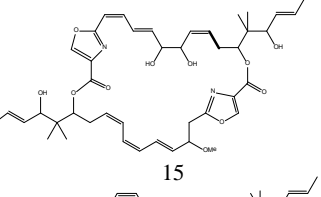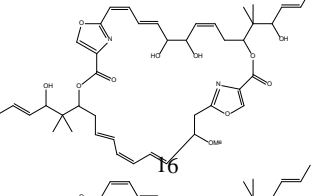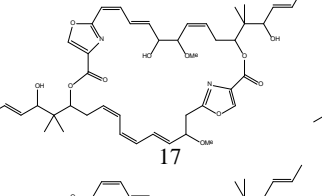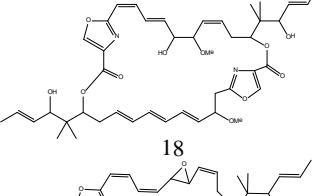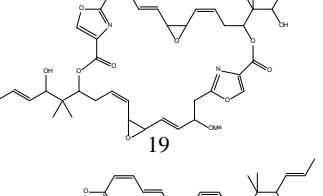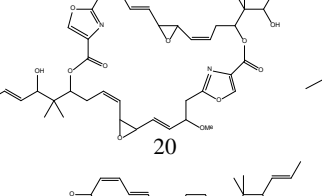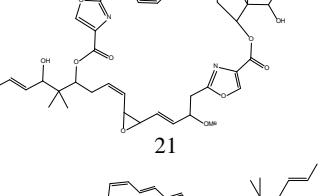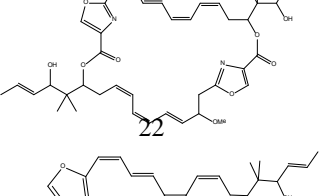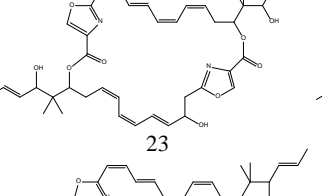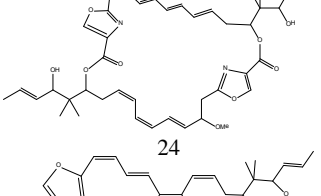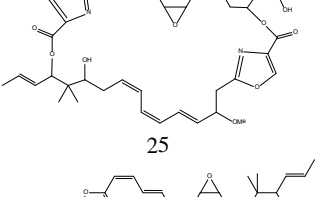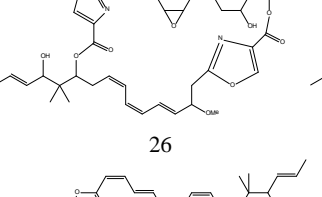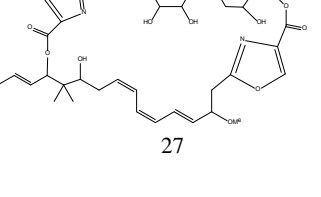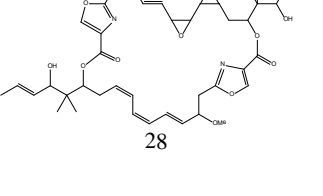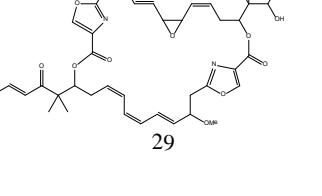

**Figure S1.** Chemical structures of disorazols.

1. Disorazol A<sub>1</sub>
2. Disorazol A<sub>2</sub>
3. Disorazol A<sub>3</sub>
4. Disorazol A<sub>4</sub>
5. Disorazol A<sub>5</sub>
6. Disorazol A<sub>6</sub>
7. Disorazol A<sub>7</sub>
8. Disorazol B<sub>1</sub>
9. Disorazol B<sub>2</sub>
10. Disorazol B<sub>3</sub>
11. Disorazol B<sub>4</sub>
12. Disorazol C<sub>1</sub>
13. Disorazol C<sub>2</sub>
14. Disorazol D<sub>1</sub>
15. Disorazol D<sub>2</sub>
16. Disorazol D<sub>3</sub>
17. Disorazol D<sub>4</sub>
18. Disorazol D<sub>5</sub>
19. Disorazol E<sub>1</sub>
20. Disorazol E<sub>2</sub>
21. Disorazol E<sub>3</sub>
22. Disorazol F<sub>1</sub>
23. Disorazol F<sub>2</sub>
24. Disorazol F<sub>3</sub>
25. Disorazol G<sub>1</sub>
26. Disorazol G<sub>2</sub>
27. Disorazol G<sub>3</sub>
28. Disorazol H
29. Disorazol I

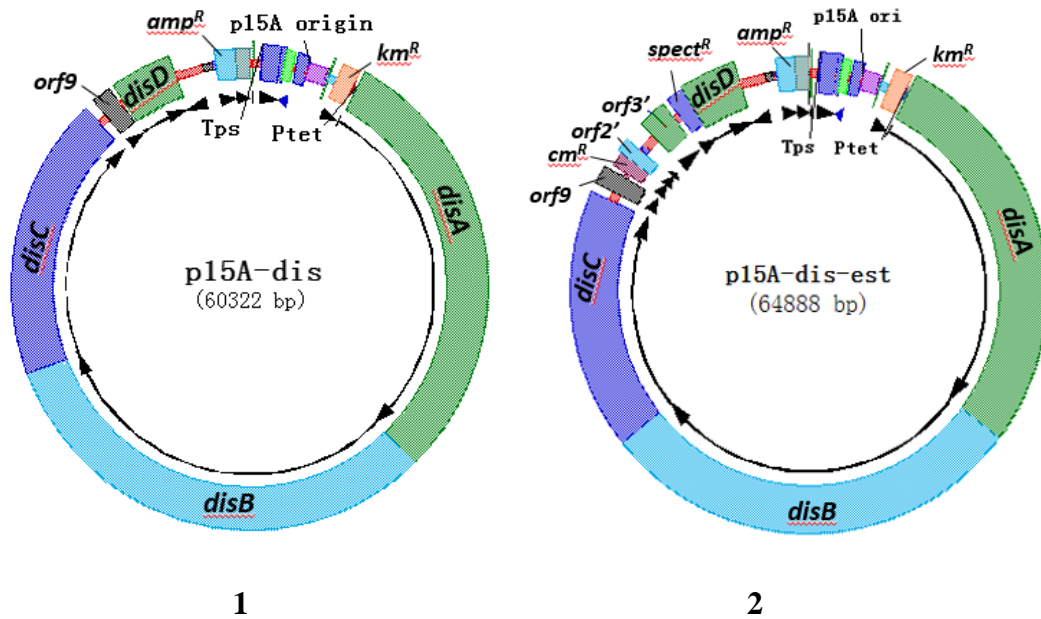

**Figure S2.** Heterologous expression constructs of two type of expression plasmids p15A-dis and p15A-dis-est.

Construct 1 is p15A-dis. Then we insert the repaired carboxyl esterase gene *orf3'* and the SAM-dependent methyl transferase gene *orf2'* together into p15A-dis by Red/ET recombineering to form construct 2 p15A-dis-est. After insertion, two genes are in the middle of *orf9* gene and *disD* gene.

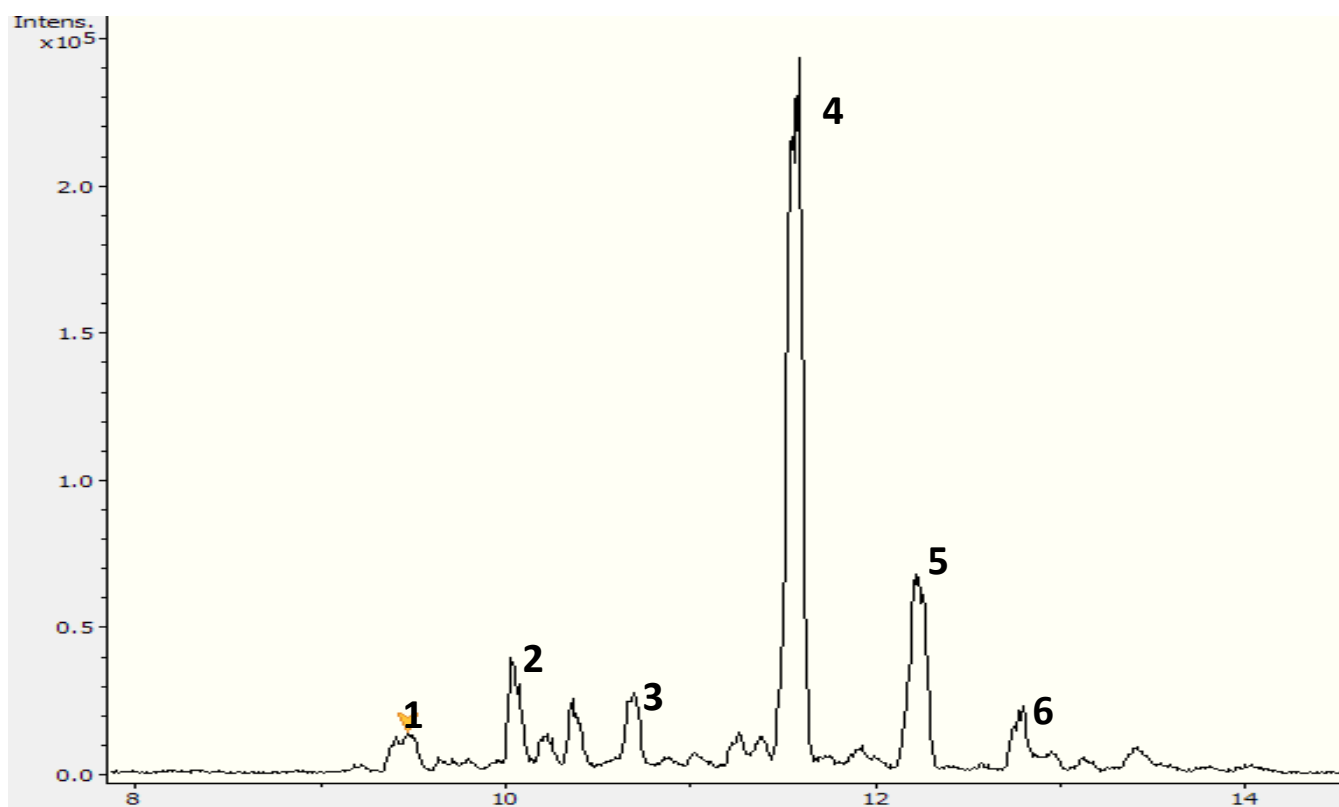

**Figure S3.** related to Figure 3. HPLC-MS analysis (BPC  $m/z$  720-780) of extracts from *M. xanthus*:: *p15A-dis*.

The peaks are disB<sub>4</sub> (1),  $m/z$  761 [M+H]<sup>+</sup>; dis762 (2),  $m/z$  763 [M+H]<sup>+</sup>; disB<sub>2</sub> (3),  $m/z$  779 [M+H]<sup>+</sup>; disA<sub>2</sub> (4),  $m/z$  745 [M+H]<sup>+</sup>; disA<sub>1</sub> (5),  $m/z$  759 [M+H]<sup>+</sup>; disF<sub>2</sub> (6),  $m/z$  729 [M+H]<sup>+</sup>.

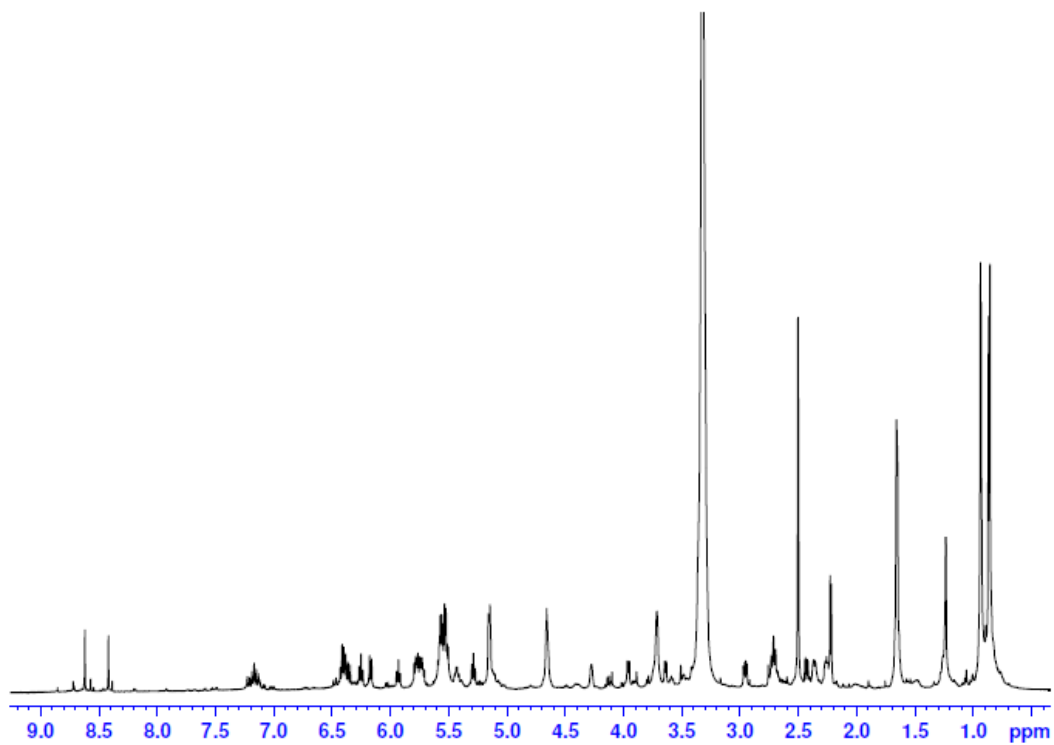

**Figure S4.**  $^1\text{H}$  NMR spectrum of disorazol A<sub>2</sub>.

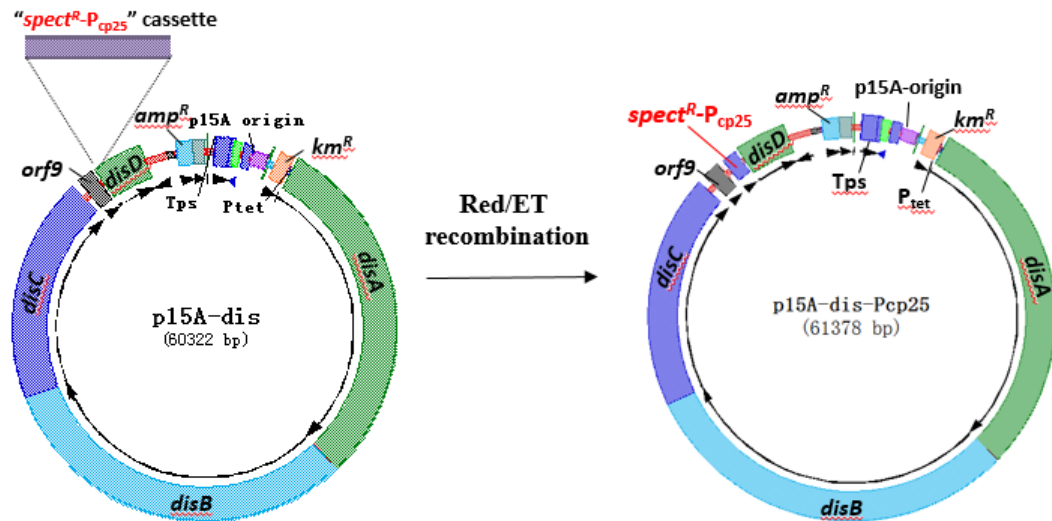

1

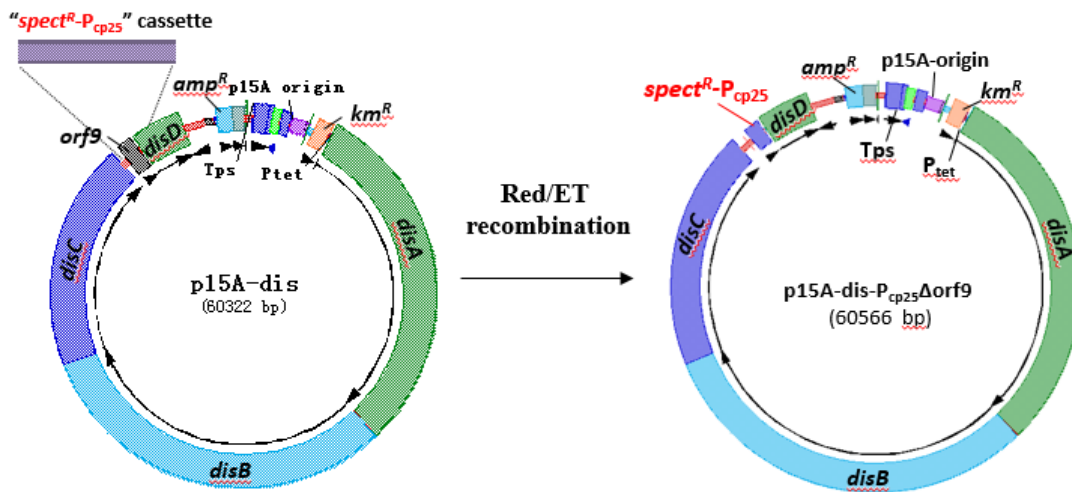

2

**Figure S5.** Modify *disD* gene through Red/ET recombineering.

1: only insert promoter  $P_{cp25}$  in front of *disD* gene.

2: insert promoter  $P_{cp25}$  in front of *disD* gene by deletion *orf9* gene.

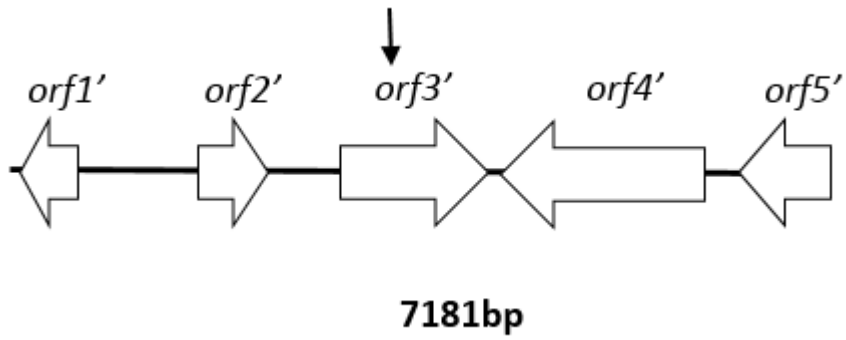

**Figure S6.** Construct of the recovered plasmid pTn-Rec\_IE2. (data according to Kopp et al.)

Diagram of the genes encoded adjacent to the transposition site of mutant

So12\_EXI\_IE-3 that was cloned into the recovered plasmid pTn-Rec\_IE-2. ↓ is the location of the transposon insertion site.



**Table S1** Oligonucleotides used in this study

| name | sequences(5'-3')                                                                                                                        | Notes                                                                         |
|------|-----------------------------------------------------------------------------------------------------------------------------------------|-------------------------------------------------------------------------------|
| P1   | AATGTGCGACAATGTGCGCCATTTTTTC<br>ACTTCACAGGTCAACGCTCACGCTGA<br>CGCTGTCCGCCGAGACCGACTTGGGC<br>TTCTACCTGCGGATCCTGGTGATGATG<br>GCGGGATCGTTG | Used to replace the backbone of disBAC plasmid                                |
| P2   | AATGAATAGTTCGACAAAAATCTAGA<br>TAACGAGGATCAACGATGGAGCAGGA<br>CGCCATTGCGATCATCGGCGTAGCGT<br>GCCGATTTCCCGGGATCCTGTGACGG<br>AAGATCACTTCG    |                                                                               |
| P3   | TCCGCTGCATCCTGGATCTGGATATGG<br>ACAGGAAGGCGTTTGAAGAAGTCGAG<br>TTTGAACAAAACAACCTTATATCG                                                   | Used to replace the backbone of pTn-Rec_IE2 plasmid                           |
| P4   | CTCAGCCCGCGTCGAGCGCGTAGACG<br>GCCGTGGCCGTCTTTCGCCCCGTCAGG<br>TCTTACCAATGCTTAATCAGTGAG                                                   |                                                                               |
| P5   | TACCGTCGCGGCCACGCGCATCTGGG<br>GCCCCCTCGGCATGAACGATACGATG<br>TACAACCCGCCCGCGGAGCTCCACGA<br>GCGCGTGGCGGCCACGGGCTACTCGA<br>CC              | Used to delete R6k-Tn-hyg genes in order to form full length of esterase gene |
| P6   | CAGATCGCTGAGATAGGTGCCTCACT<br>GATTAAGCATTGGTAAGCTTGAGACC<br>CTTGCCCGGAAACATGTATGCTTTCA<br>TCGGTTCTTCCTCTTATAATTTTTTTAA<br>TCTGTTA       | Used to form the homology arm to p15A-dis plasmid                             |
| P7   | CCTCAGCCCGCGTCGAGCGCGTAGAC<br>GGCCGTGGCCGTCTTTCGCCTAACGTG<br>ACTGGCAAGAGATAT                                                            |                                                                               |
| P8   | TGACCTCCGGCTCGAGCACGCGCGCC<br>AGCGACATGCTCGCATCCTTCTCCGTT<br>ACGCCCCGCCCTGCCACTC                                                        | Used to form the homology arm to p15A-dis plasmid                             |
| P9   | TCAGCCCCATACGATATAAGTTGTTTT<br>GTTCAAACCTCGACTTCAAGCTTGCGCC<br>GAGGCGAGCCCCTGGCGGGCACGTCG<br>TGGCGGCGCGCCTCCTGGTGTCCTGT<br>TGATACC      |                                                                               |
| P10  | TGGAAAGCGCGATGACCATCCAGGAG<br>TTTGCCAACTTGTCTGCGGAG                                                                                     | Used to verify <i>M. xanthus</i> :p15A-dis mutant.                            |
| P11  | TGTGGGAGGCGAGGGCCTCGGCGAAG<br>AGGGTGAGGAGCAGGGCCGTCGG                                                                                   |                                                                               |

|     |                                                                                                                                        |                                                                                                         |
|-----|----------------------------------------------------------------------------------------------------------------------------------------|---------------------------------------------------------------------------------------------------------|
| P12 | TGGAGGTCCGCCCGATCGCCGAGGGC<br>GAGCTGCACGAGCGCCTCGCGCGGCA<br>GGAGCCCTTACGCCCCGCCCTGCCACT<br>CATCGCAG                                    | Used to inactivate <i>disA</i> gene                                                                     |
| P13 | TGATAGAGAAAAGTGAAATGAATAGT<br>TCGACAAAAATCTAGGAGGATGATGA<br>CGCCAACTTTTGGCGAAAATGAGAC                                                  |                                                                                                         |
| P14 | CGTAGGACACCCGGTTGGCGATCGAC<br>GAGTAATCGGCGCTCGCGATCACGGG<br>GTTTCCCTTGTGGAGCTCGTCCTGTTA<br>CGCCCCGCCCTGCCACTCATCGCA                    | Used to inactivate <i>disB</i> gene                                                                     |
| P15 | TGCGCCGCTCGGCTATTACCAATCGAC<br>CTGGACCAGAAGCGCGCTTTGAACGT<br>CGGGGTAACCTCCCAACTTTTGGCGA<br>AAATGAGAC                                   |                                                                                                         |
| P16 | CGGCTCGGTGAGCGAGAGCCGCAGCT<br>CGAAGAAGGGCCACTGATCCAGGGGG<br>AATACCCTTTACGCCCCGCCCTGCCAC<br>TCATCGCAG                                   | Used to inactivate <i>disC</i> gene                                                                     |
| P17 | TGGCCGGCGTACCGGGCGAGGAGCTG<br>ACTCGGCTCTACGCCATCCTGCAAGA<br>GGAATGATGACCAACTTTTGGCGAAA<br>ATGAGAC                                      |                                                                                                         |
| P18 | TGAGACCCTTGCCCGGGAAACATGTA<br>TGCTTTCATCGGTTCTTCTCTCTATCA<br>CTGATAGGGAGTGGTAAAATAACTCT<br>ATCAATGATAGAGTGTCAACAGTACT<br>ATGTGATTATACC | Used to insert P <sub>cp25</sub> promoter in front of <i>disD</i> gene                                  |
| P19 | CGCGCCGAGGCGAGCCCCCTGGCGGGC<br>ACGTCTGTGGCGGCGCGCTCCTCCCCG<br>CGAGCACGTGTTGACAATTAATC                                                  |                                                                                                         |
| P20 | TGCGTTTGATATCGAGCGATCCGCATG<br>ATAGACGACCCCGCGCTGAACCGAGC<br>ACGTGTTGACAATTAATC                                                        | Used to delete <i>orf9</i> gene by insertion of P <sub>cp25</sub> promoter in front of <i>disD</i> gene |

---

**Table S2** related to Figure 3. Target screening analysis data of extracts from *M. xanthus::p15A-dis*.

| RT [min]     | m/z              | Compound                    | sum formula                                                                   |
|--------------|------------------|-----------------------------|-------------------------------------------------------------------------------|
| 4.36         | 335.16205        | Ar001-23-2                  | C <sub>14</sub> H <sub>27</sub> N <sub>2</sub> O <sub>5</sub> S <sub>1</sub>  |
| 12.48        | 384.28846        | AS_DK1622_383-1             | C <sub>25</sub> H <sub>38</sub> N <sub>1</sub> O <sub>2</sub>                 |
| 12.48        | 384.28846        | AS_DK1622_383-2             | C <sub>25</sub> H <sub>38</sub> N <sub>1</sub> O <sub>2</sub>                 |
| 5.1          | 631.27543        | Cittilin A                  | C <sub>34</sub> H <sub>39</sub> N <sub>4</sub> O <sub>8</sub>                 |
| <b>12.81</b> | <b>729.37322</b> | <b>Disorazol F2</b>         | <b>C<sub>42</sub>H<sub>52</sub>N<sub>2</sub>O<sub>9</sub></b>                 |
| <b>11.58</b> | <b>745.36879</b> | <b>Disorazol A2</b>         | <b>C<sub>42</sub>H<sub>53</sub>N<sub>2</sub>O<sub>10</sub></b>                |
| <b>12.24</b> | <b>759.38345</b> | <b>Disorazol A1</b>         | <b>C<sub>43</sub>H<sub>55</sub>N<sub>2</sub>O<sub>10</sub></b>                |
| <b>12.24</b> | <b>759.38345</b> | <b>Disorazol A3</b>         | <b>C<sub>43</sub>H<sub>55</sub>N<sub>2</sub>O<sub>10</sub></b>                |
| <b>12.24</b> | <b>759.38345</b> | <b>Disorazol A4</b>         | <b>C<sub>43</sub>H<sub>55</sub>N<sub>2</sub>O<sub>10</sub></b>                |
| <b>7.77</b>  | <b>779.37324</b> | <b>Disorazol B2</b>         | <b>C<sub>42</sub>H<sub>55</sub>N<sub>2</sub>O<sub>12</sub></b>                |
| <b>9.49</b>  | <b>761.36162</b> | <b>Disorazol B4</b>         | <b>C<sub>42</sub>H<sub>53</sub>N<sub>2</sub>O<sub>11</sub></b>                |
| <b>10.04</b> | <b>763.37894</b> | <b>Disorazol 762</b>        | <b>C<sub>42</sub>H<sub>54</sub>N<sub>2</sub>O<sub>11</sub></b>                |
| 7.44         | 519.25799        | DKxanthen-518               | C <sub>29</sub> H <sub>35</sub> N <sub>4</sub> O <sub>5</sub>                 |
| 7.8          | 519.25783        | DKxanthen-518               | C <sub>29</sub> H <sub>35</sub> N <sub>4</sub> O <sub>5</sub>                 |
| 7.18         | 535.25311        | DKxanthen-534               | C <sub>29</sub> H <sub>35</sub> N <sub>4</sub> O <sub>6</sub>                 |
| 7.54         | 535.25281        | DKxanthen-534               | C <sub>29</sub> H <sub>35</sub> N <sub>4</sub> O <sub>6</sub>                 |
| 8.07         | 549.26825        | Dkxanthen-548               | C <sub>30</sub> H <sub>37</sub> N <sub>4</sub> O <sub>6</sub>                 |
| 3.56         | 183.09128        | Marinoquinoline A           | C <sub>12</sub> H <sub>11</sub> N <sub>2</sub>                                |
| 5.36         | 225.13794        | Marinoquinoline B           | C <sub>15</sub> H <sub>17</sub> N <sub>2</sub>                                |
| 5.84         | 259.12181        | Marinoquinoline C           | C <sub>18</sub> H <sub>15</sub> N <sub>2</sub>                                |
| 2.55         | 197.12852        | Mediacompound-Amb-001       | C <sub>10</sub> H <sub>17</sub> N <sub>2</sub> O <sub>2</sub>                 |
| 3.56         | 245.12887        | Mediacompound-Amb-002       | C <sub>14</sub> H <sub>17</sub> N <sub>2</sub> O <sub>2</sub>                 |
| 4.01         | 245.12862        | Mediacompound-Amb-003       | C <sub>14</sub> H <sub>17</sub> N <sub>2</sub> O <sub>2</sub>                 |
| 3.51         | 211.14406        | Mediacompound-Amb-004       | C <sub>11</sub> H <sub>19</sub> N <sub>2</sub> O <sub>2</sub>                 |
| 13.01        | 416.31467        | Myxalamid A                 | C <sub>26</sub> H <sub>42</sub> N <sub>1</sub> O <sub>3</sub>                 |
| 12.59        | 402.2989         | Myxalamid B                 | C <sub>25</sub> H <sub>40</sub> N <sub>1</sub> O <sub>3</sub>                 |
| 11.84        | 388.28299        | Myxalamid C                 | C <sub>24</sub> H <sub>38</sub> N <sub>1</sub> O <sub>3</sub>                 |
| 13.83        | 430.33012        | Myxalamid-430               | C <sub>27</sub> H <sub>44</sub> N <sub>1</sub> O <sub>3</sub>                 |
| 5.4          | 405.16444        | Myxochelin A                | C <sub>20</sub> H <sub>25</sub> N <sub>2</sub> O <sub>7</sub>                 |
| 3.93         | 404.18101        | Myxochelin B                | C <sub>20</sub> H <sub>26</sub> N <sub>3</sub> O <sub>6</sub>                 |
| 13           | 624.4456         | Myxovirescin A              | C <sub>35</sub> H <sub>62</sub> N <sub>1</sub> O <sub>8</sub>                 |
| 12.73        | 622.42858        | Myxovirescin B              | C <sub>35</sub> H <sub>60</sub> N <sub>1</sub> O <sub>8</sub>                 |
| 16.86        | 632.44647        | Myxovirescin C              | C <sub>35</sub> H <sub>63</sub> N <sub>1</sub> Na <sub>1</sub> O <sub>7</sub> |
| 11.03        | 642.45472        | Myxovirescin Variante KP641 | C <sub>35</sub> H <sub>64</sub> N <sub>1</sub> O <sub>9</sub>                 |
| 2.3          | 261.12324        | Tyr-Pro Dioxopiperazin      | C <sub>14</sub> H <sub>17</sub> N <sub>2</sub> O <sub>3</sub>                 |
| 2.41         | 261.1234         | Tyr-Pro Dioxopiperazin      | C <sub>14</sub> H <sub>17</sub> N <sub>2</sub> O <sub>3</sub>                 |

The shadow part are disorazol and its derivatives (in bold in the table).

**Table S3** related to Figure 3. NMR data for disA<sub>2</sub> comparison with the natural product.

| pos                | $\delta_{\text{H}}$ , mult ( <i>J</i> in Hz) Disorazol <sup>1</sup> A <sub>2</sub> | $\delta_{\text{H}}$ , mult ( <i>J</i> in Hz) Disorazol <sup>2</sup> A <sub>2</sub> |
|--------------------|------------------------------------------------------------------------------------|------------------------------------------------------------------------------------|
| 3-H                | 8.34, s br                                                                         | 8.42, s                                                                            |
| 5-H                | 6.18, d br (11.7)                                                                  | 6.17, d (11.9)                                                                     |
| 6-H                | 6.47, dd (11.7, 11.9)                                                              | 6.41, m                                                                            |
| 7-H                | 7.36, dd (11.9, 15)                                                                | 7.16, dd (11.4, 14.7)                                                              |
| 8-H                | 5.71, m                                                                            | 5.75, m                                                                            |
| 9-H                | 3.66, dd (4.2, 9.9)                                                                | 3.64, dd (4.4, 9.9)                                                                |
| 10-H               | 4.06, dd (4.2, 9.7)                                                                | 3.96, dd (4.2, 10.0)                                                               |
| 11-H               | 5.34, dd (9.7, 11.5)                                                               | 5.28, dd (9.0, 11.2)                                                               |
| 12-H               | 5.86, ddd (5.5, 11, 11)                                                            | 5.77, m                                                                            |
| 13-Ha              | 2.88, m                                                                            | 2.71, m                                                                            |
| 13-Hb              | 2.46, ddbr                                                                         | 2.43, dd (3.2, 14.6)                                                               |
| 14-H               | 5.35, dd (2.5, 11)                                                                 | 5.15, m                                                                            |
| 16-H               | 3.88, d (7.5)                                                                      | 3.73                                                                               |
| 17-H               | 5.64, m                                                                            | 5.74, m                                                                            |
| 18-H               | 5.71, m                                                                            | 5.15, m                                                                            |
| 19-H <sub>3</sub>  | 1.74, d (1, 6)                                                                     | 1.65                                                                               |
| 20-H <sub>3</sub>  | 1.07 <sup>a</sup> , s                                                              | 0.94 <sup>a</sup> , s                                                              |
| 21-H <sub>3</sub>  | 1.03 <sup>a</sup> , s                                                              | 0.93 <sup>a</sup> , s                                                              |
| 3'-H               | 8.49, s                                                                            | 8.62, s                                                                            |
| 5'-Ha              | 3.11, dd (5.4, 14.9)                                                               | 2.95, dd (6.0, 14.7)                                                               |
| 5'-Hb              | 2.65, dd (3.8, 14.9)                                                               | 2.43, dd (3.3, 14.4)                                                               |
| 6'-H               | 4.42, m                                                                            | 4.66, m                                                                            |
| 7'-H               | 5.88, dd (9, 15.1)                                                                 | 5.93, dd (9.4, 12.0)                                                               |
| 8'-H               | 6.43, dd (11, 15.1)                                                                | 6.39, m                                                                            |
| 9'-H               | 6.01, dd (11, 11)                                                                  | 6.17, d (11)                                                                       |
| 10'-H              | 6.37, dd(11, 11)                                                                   | 6.36, m                                                                            |
| 11'-H              | 6.48, dd(11, 11)                                                                   | 6.40, m                                                                            |
| 12'-H              | 5.55, ddd (5.5, 11, 11)                                                            | 5.54, m                                                                            |
| 13'-Ha             | 2.88, m                                                                            | 2.72, m                                                                            |
| 13'-Hb             | 2.36, m                                                                            | 2.26, m                                                                            |
| 14'-H              | 5.35, dd (2.5, 11.6)                                                               | 5.15, m                                                                            |
| 16'-H              | 3.88, d (7.5)                                                                      | 3.72, m                                                                            |
| 17'-H              | 5.64, m                                                                            | 5.54, m                                                                            |
| 18'-H              | 5.71, m                                                                            | 5.50, m                                                                            |
| 19'-H <sub>3</sub> | 1.74, d                                                                            | 1.65                                                                               |
| 20'-H <sub>3</sub> | 1.02 <sup>b</sup> , s                                                              | 0.85 <sup>b</sup> , s                                                              |
| 21'-H <sub>3</sub> | 1.01 <sup>b</sup> , s                                                              | 0.87 <sup>b</sup> , s                                                              |

<sup>1</sup>NMR data taken in MeOH-*d*<sub>4</sub>, <sup>2</sup> DMSO-*d*<sub>6</sub> <sup>a,b</sup> overlapping signals.

**Table S4** Proteins encoded on the recovered plasmid pTn-Rec\_IE-2 and their putative function in disorazol biosynthesis (data according to Kopp et al.)

| Gene          | Size (bp) | Proposed function of the similar protein | Similarity/ Identity |
|---------------|-----------|------------------------------------------|----------------------|
| <i>orf1</i> ' | 522       | arylesterase-related protein             | 29%/ 43%             |
| <i>orf2</i> ' | 591       | SAM- dependent methyl transferase        | 48%/ 58%             |
| <i>orf3</i> ' | 1284      | putative esterase $\beta$ -lactamase     | 35%/ 51%             |
| <i>orf4</i> ' | 1782      | adenylate cyclase                        | 31%/ 51%             |
| <i>orf5</i> ' | 854       | outer membrane protein (incomplete)      | 36%/ 46%             |

## Genetic inactivation of the disorazol biosynthetic genes

As mentioned earlier, ten PKS modules and one NRPS module are encoded in the genes *disA-C* in the conserved disorazol biosynthetic gene cluster. To confirm that *disA-C* is involved in the biosynthesis of disorazol, the module was inactivated by disrupting the gene, including the PKS modules 1 and 5 and the NRPS module, on the p15A-dis expression construct (Figure 1). A 1100 bp fragment conferring chloramphenicol resistance (cm) to the linker region between these modules was separately inserted into the p15A-dis construct by homologous recombination in *E. coli*. The modified deletion constructs pDisA, pDisB and pDisC were screened using low-salt LB plates plus chloramphenicol and then verified by restriction analysis (Table S1). The successfully modified constructs were then transformed into *M. xanthus* DK1622, and the production profile of positive recombinants was analyzed by HPLC-MS (Figure S6-I).

The mutant strains no longer produced disorazols. The missing peaks indicate that all these modules and genes are vital for the disorazol biosynthetic pathway. Without any one of these genes, no disorazols are produced. It is, however, still possible that the significant changes in the cluster architecture that were caused by the gene inactivation may have affected the expression of the biosynthetic enzymes (Figure S6-II).

## **Biological evaluation**

Cell lines were obtained from the German Collection of Microorganisms and Cell Cultures (*Deutsche Sammlung für Mikroorganismen und Zellkulturen*, DSMZ) or were part of our internal collection and were cultured under conditions recommended by the depositor. Half-inhibitory concentrations (IC<sub>50</sub>) in terms of growth inhibition were determined as described previously<sup>1</sup>. In brief, cells were treated in 96-well plates with serial dilutions of disorazol A<sub>1</sub> and A<sub>2</sub> for 5 d. Cell viability was assessed via tetrazolium salt reduction and average IC<sub>50</sub> values were obtained in two independent experiments by sigmoidal curve fitting.

## Supplemental references

1. Herrmann, J., Hüttel, S., & Müller R. Discovery and biological activity of new chondramides from *Chondromyces* sp. *ChemBioChem*. **14**, 1573-1580 (2013).
